# Supplementary material for: Infrared and Raman spectroscopy of non-conventional hydrogen bonding betweenN,N′-disubstituted urea and thiourea groups: a combined experimental and theoretical investigation
Source: Royal Society of Chemistry journal article supplement (doi:10.1039/c8cp06625f), 2019-01-01
Supplement: c8cp06625f1.pdf [file c8cp06625f1.pdf]

**“Infrared and Raman spectroscopy of non-conventional hydrogen bonding between N, N’  
disubstituted urea and thiourea groups: A combined experimental and theoretical  
investigation.”**

**Supporting information**

**Table S1.** Hydrogen bond lengths in MUT compared for single crystal diffraction (XRD) and first principles calculations (DFT) (values in Å)

| MUT-XRD  |           | MUT-DFT simulation |           |
|----------|-----------|--------------------|-----------|
| IB       | DB        | IB                 | DB        |
| SN2 3.34 | ON4 2.881 | SN2 3.305          | ON4 2.822 |
| SN1 3.52 | ON3 2.852 | SN1 3.50           | ON3 2.910 |

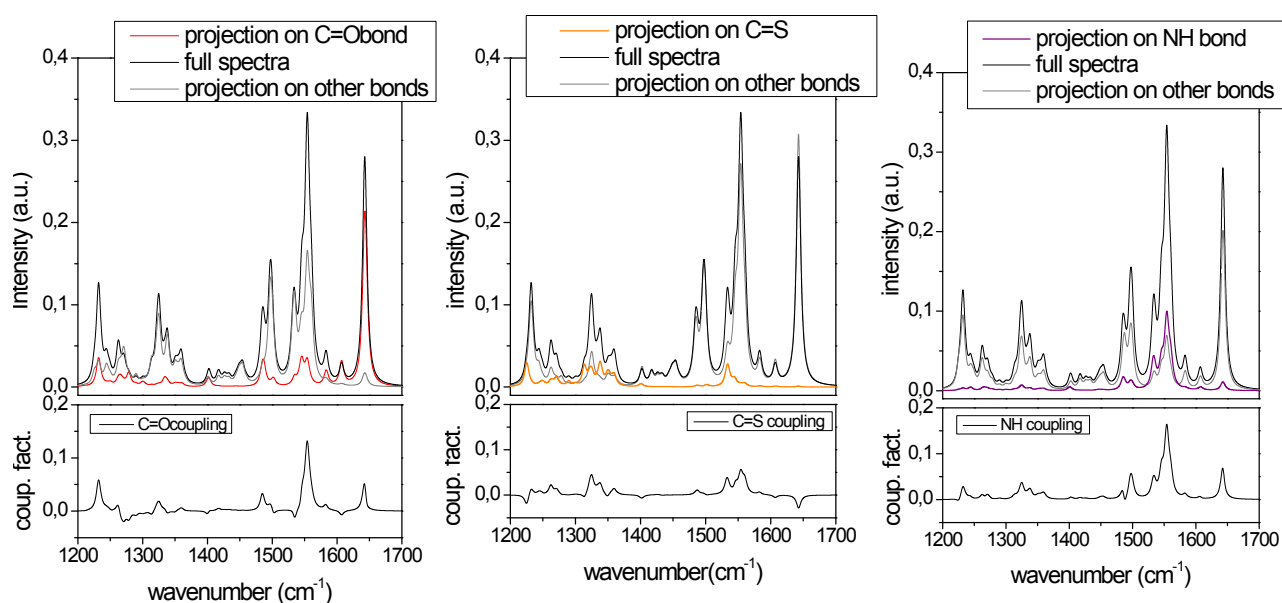

**Figure S1.** DFT infrared partial contribution to spectra for C=O, C=S and N-H bonds. Total spectra is given in black and the coupling coefficients of C=O, C=S and N-H bond vibration to vibrations involving other atomic groups are respectively given below.

**Table S2.** Raman vibration in the region of amides. . (Exp. =experimental, Calc. = calculation)

| Exp.(cm <sup>-1</sup> ) | Calc. (cm <sup>-1</sup> ) | Principal assignment            | Complement on assignment                                                                                                                                          |
|-------------------------|---------------------------|---------------------------------|-------------------------------------------------------------------------------------------------------------------------------------------------------------------|
| 10K                     |                           |                                 |                                                                                                                                                                   |
| 589                     | 578                       | thioamide V                     | asymmetric oop N-H bending involving <b>DB</b> (N3-H and N4-H) coupled to $\nu(\text{C-N})$ , ring vibration and a weak symmetric N-H bending involving <b>IB</b> |
| 579, 598                | 592 to 594                | asymmetric $\omega(\text{N-H})$ | involving <b>DB</b> (N3-H) and weak symmetric oop N-H bending involving <b>IB</b> (N1-H)                                                                          |
| 608                     | 607                       | symmetric $\omega(\text{N-H})$  | involving <b>DB</b> (N4-H and N3-H) and weak symmetric oop N-H bending involving <b>IB</b> (N2-H)                                                                 |
| 625                     | 620                       | asymmetric $\omega(\text{N-H})$ | involving <b>DB</b> (N4-H and N3-H) and weak symmetric oop NH bending involving <b>IB</b> (N1-H and N2-H)                                                         |
| 644                     | 644-656                   | amide V                         | symmetric oop N-H bending involving <b>IB</b> (N1-H and N2-H)                                                                                                     |
| 695                     | 698-707                   | thioamide I                     | $\nu(\text{C-S})$ coupling with symmetric $\omega(\text{N-H})$ , involving <b>IB</b> and <b>DB</b>                                                                |
|                         | 716                       | $\delta(\text{C-H})$            | from aryl and butyl coupled to weak $\nu(\text{C-S})$ and oop NH bending                                                                                          |
| 718                     | 722-726                   | thioamide V                     | asymmetric oop N-H bending involving <b>DB</b> (N3-H and N4-H)                                                                                                    |
|                         | 730                       | thioamide V                     | asymmetric oop N-H bending involving <b>DB</b> (N3-H and N4-H)                                                                                                    |
|                         | 740                       | thioamide V                     | and strong $\omega(\text{NH})$ involving <b>IB</b>                                                                                                                |
|                         | 763                       | Amide VI                        | ip $\delta(\text{C=O})$ strongly attenuated by coupling                                                                                                           |
| 758                     | 769                       | $\delta(\text{C-H})$            | from butyl                                                                                                                                                        |
| 1437                    | 1432 to 1478              | $\delta(\text{C-H})$            | of C-H <sub>3</sub> and/or C-H <sub>2</sub> on butyl                                                                                                              |
| 1446                    | 1487                      | amide I                         | coupled with $\nu(\text{C=C})$ vibration of aryl ring and $\nu(\text{C-N})$                                                                                       |
| 1462                    |                           |                                 |                                                                                                                                                                   |
| 1507                    | 1499 to 1502              | $\nu(\text{C=C})$               | of aryl ring slightly coupled to $\nu(\text{C=C})$ and to $\delta(\text{N-H})$                                                                                    |
|                         | 1532                      | amide II                        | $\delta(\text{N-H})$ involving <b>DB</b> (N3-H), coupling with $\nu(\text{C=O})$                                                                                  |
|                         | 1532b                     |                                 | and weak $\delta(\text{N-H})$ involving <b>IB</b> (N1-H and N2-H)                                                                                                 |
|                         | 1533                      | amide II                        | $\delta(\text{N-H})$ involving <b>DB</b> (N3-H) and weakly involving <b>IB</b> (N1-H and N2-H)                                                                    |

|                         |              |                   |                                                                                |
|-------------------------|--------------|-------------------|--------------------------------------------------------------------------------|
|                         | 1534         | v(C=C)            | in aryl ring coupled to $\delta$ (N-H) involving N1-H and N2-H                 |
| 1557                    | 1544         | amide II and      | $\delta$ (N-H) involving <b>DB</b> (N3-H, N4-H) and <b>IB</b> (N2-H)           |
|                         | 1544'        | thioamide II      |                                                                                |
|                         | 1545         |                   | $\delta$ (N-H) involving <b>DB</b> (N3-H) and <b>IB</b> (N2-H)                 |
| 1569                    | 1547 to 1552 |                   | $\delta$ (N-H) involving <b>DB</b> (N3-H, N4-H) and <b>IB</b> (N2-H)           |
| 1591                    | 1587 to 1588 |                   | $\delta$ (N-H) involving <b>DB</b> (N3-H) and <b>IB</b> (N1-H) coupled to aryl |
| 1610                    | 1609 to 1609 | v(C=C)            | in aryl ring slightly coupled to $\delta$ (N-H)                                |
| 1658                    | 1638         | amide I           | v(C=O) coupled to v(C=C) vibration of aryl ring                                |
|                         | 1639         |                   |                                                                                |
| 1664                    | 1647         |                   |                                                                                |
| 2869,2934,<br>2901,2964 | 2936 to 3021 | v(C-H)            | involving C-H <sub>2</sub> in butyl group                                      |
|                         | 3050 to 3088 |                   | involving butyl C-H <sub>3</sub> in butyl group                                |
| 3048,3082               | 3111 to 3158 |                   | involving C-H from Aryl                                                        |
| 3160                    | 3202 to 3212 | asymmetric v(N-H) | involving <b>IB</b> (N2-H) and <b>DB</b> (N3-H)                                |
| 3287                    | 3325 to 3327 | asymmetric v(N-H) | dominated by <b>DB</b> (N3-H)                                                  |
|                         | 3364 to 3369 |                   | dominated by <b>IB</b> (N1-H)                                                  |
